# Supplementary material for: Selectivity of hosts for guests by liquid-assisted grinding: differences between solution and mechanochemistry
Source: Royal Society of Chemistry journal article supplement (doi:10.1039/d1ce01286j), 2021-01-01
Supplement: d1ce01286j1.pdf [file d1ce01286j1.pdf]

## **Selectivity of hosts for guests by LAG: differences between solution and mechanochemistry**

Jean Lombard, Heinrich Laker, Francis Prins, Helene Wahl, Tanya le Roex and Delia A. Haynes  
*Department of Chemistry & Polymer Science, Stellenbosch University, P. Bag X1, Matieland, 7602, South Africa.*

### **Electronic Supplementary Information**

|                         |        |
|-------------------------|--------|
| Experimental details    | page 2 |
| Crystallographic data   | page 3 |
| PXRD                    | page 4 |
| Competition experiments | page 5 |

## Experimental details

### Instrument details

Single-crystal X-ray diffraction was carried out using a Bruker SMART Apex III X-ray diffractometer with a MoK $\alpha$  radiation source ( $\lambda = 0.71073 \text{ \AA}$ ). This was acquired from a 0.5 mm MonoCap collimator and a fine-focus sealed tube. Sample temperature was maintained using an Oxford Cryosystems Cryostream 700+. Data collection and reduction were carried out using the Bruker software package SAINT<sup>1</sup> from within the APEXII suite. Finally, X-Seed was utilised as the graphical interface<sup>2</sup> to solve (SHELXS<sup>3</sup>) and refine (SHELXL<sup>4</sup>) the crystal structures.

<sup>1</sup>H NMR was performed with a 300 MHz, 400 MHz or a 600 MHz Agilent spectrometer. Samples – between 10-30 mg – were all dissolved in deuterated dimethyl sulfoxide (DMSO-d<sub>6</sub>).

PXRD analyses were performed on a Bruker D2 phaser X-ray diffractometer. The diffractometer, which operated at 10 mA current and 30 kV voltage, produced radiation from a Cu source that has a wavelength of 1.54183  $\text{\AA}$ . The crystal sample was removed and dried on filter paper, after which it was gently ground with a mortar and pestle. It was then carefully compressed on a zero-background holder with a microslide. The scans comprised of approximately 2260 steps of 0.500 seconds, with step size 0.0161  $^\circ$ , at angles from  $2\theta = 4 - 40^\circ$ .

### Experimental details

Chemicals were purchased from Sigma-Aldrich (South Africa) and used as received.

#### Synthesis of the solvates of **1**

Crystals of **1**•DMA were obtained by combining pamoic acid (53 mg, 0.14 mmol) with 1,10-phenanthroline hydrate (27 mg, 0.15 mmol) in 6 ml DMA at 80  $^\circ\text{C}$  in a glass vial, and stirring until the components dissolved. The vial was capped and left on a shelf to allow crystallisation to occur. Clear, yellow crystals formed within a week.  $\delta_{\text{H}}$  (300 MHz, DMSO-d<sub>6</sub>) 1.95 (3H, s), 2.78 (3H, s), 2.93 (3H, s), 4.80 (2H, s), 7.21 (2H, J = 7.9 Hz, J = 6.9 Hz, J = 0.8 Hz, ddd), 7.36 (2H, J = 8.3 Hz, J = 6.8 Hz, J = 1.4 Hz, ddd), 7.85 (4H, m), 8.04 (2H, s), 8.13 (2H, J = 8.8 Hz, d), 8.46 (2H, s), 8.58 (2H, J = 8.1 Hz, J = 1.7 Hz, dd), 9.13 (2H, J = 4.4 Hz, J = 1.75, dd).

Similarly, crystals of **1**•DMF were obtained by combining pamoic acid (53 mg, 0.14 mmol) with 1,10-phenanthroline hydrate (27 mg, 0.15 mmol) in 3 ml DMF at 80  $^\circ\text{C}$ , followed by crystallisation. Clear, yellow crystals formed within 1 to 2 days.  $\delta_{\text{H}}$  (300 MHz, DMSO-d<sub>6</sub>) 2.72 (3H, s), 2.88 (3H, s), 4.79 (2H, s), 7.21 (2H, J = 7.9 Hz, J = 6.9 Hz, J = 0.8 Hz, ddd), 7.36 (2H, J = 8.3 Hz, J = 6.8 Hz, J = 1.4 Hz, ddd), 7.84 (4H, m), 7.95 (1H, s), 8.05 (2H, s), 8.13 (2H, J = 8.8 Hz, d), 8.46 (2H, s), 8.59 (2H, J = 8.1 Hz, J = 1.7 Hz, dd), 9.14 (2H, J = 4.4 Hz, J = 1.8 Hz, dd).

The DMSO solvate, **1**•DMSO, was obtained by combining pamoic acid (53 mg, 0.14 mmol) with 1,10-phenanthroline hydrate (27 mg, 0.15 mmol) in 4 ml DMF at 65  $^\circ\text{C}$ , followed by crystallisation. Clear, yellow crystals formed within a week.  $\delta_{\text{H}}$  (300 MHz, DMSO-d<sub>6</sub>) 2.54 (6H, s), 4.79 (2H, s), 7.21 (2H, J = 7.9 Hz, J = 6.8 Hz, J = 0.8 Hz, ddd), 7.37 (2H, J = 8.3 Hz, J = 6.8 Hz, J = 1.4 Hz, ddd), 7.86 (4H, m), 8.05 (2H, s), 8.13 (2H, J = 8.1 Hz, d), 8.46 (2H, s), 8.58 (2H, J = 8.2 Hz, J = 1.8 Hz, dd), 9.14 (2H, J = 4.4 Hz, J = 1.8 Hz, dd).

Crystals of **1·THF** were obtained by combining pamoic acid (53 mg, 0.14 mmol) with 1,10-phenanthroline hydrate (27 mg, 0.15 mmol) in 8 ml THF and 0.5 ml water at 65 °C, and stirring until the components dissolved. The vial was capped and left on a shelf for crystallisation to occur. Clear, yellow crystals formed within a week.  $\delta_{\text{H}}$  (300 MHz, DMSO- $d_6$ ) 1.74 (4H\*, m), 3.59 (4H\*, m), 4.79 (2H, s), 7.21 (2H, J = 7.9 Hz, J = 6.8 Hz, J = 0.8 Hz, ddd), 7.37 (2H, J = 8.3 Hz, J = 6.8 Hz, J = 1.4 Hz, ddd), 7.86 (4H, m), 8.04 (2H, s), 8.13 (2H, J = 8.1 Hz, d), 8.46 (2H, s), 8.58 (2H, J = 8.2 Hz, J = 1.7 Hz, dd), 9.13 (2H, J = 4.3 Hz, J = 1.7 Hz, dd).

\* These peaks represent the eight hydrogen atoms of THF, however the integrals do not add up to this total as the THF solvate is not fully occupied by solvent molecules.

### Single crystal data

**Table S1** Selected crystallographic parameters for the isostructural solvates of **1**

|                                             | <b>1·DMA</b>                                                  | <b>1·DMSO</b>                                                   | <b>1·DMF*</b>                                                 | <b>1·THF</b>                                                  |
|---------------------------------------------|---------------------------------------------------------------|-----------------------------------------------------------------|---------------------------------------------------------------|---------------------------------------------------------------|
| Chemical formula                            | C <sub>39</sub> H <sub>32</sub> N <sub>2</sub> O <sub>7</sub> | C <sub>39</sub> H <sub>33</sub> N <sub>3</sub> O <sub>7</sub> S | C <sub>38</sub> H <sub>31</sub> N <sub>3</sub> O <sub>7</sub> | C <sub>39</sub> H <sub>32</sub> N <sub>2</sub> O <sub>7</sub> |
| Formula weight /g mol <sup>-1</sup>         | 655.68                                                        | 646.69                                                          | 641.66                                                        | 640.66                                                        |
| Crystal system                              | Triclinic                                                     | Triclinic                                                       | Triclinic                                                     | Triclinic                                                     |
| Space group                                 | <i>P</i> $\bar{1}$                                            | <i>P</i> $\bar{1}$                                              | <i>P</i> $\bar{1}$                                            | <i>P</i> $\bar{1}$                                            |
| <i>a</i> /Å                                 | 11.035(2)                                                     | 10.5540(2)                                                      | 10.699(2)                                                     | 10.653(3)                                                     |
| <i>b</i> /Å                                 | 11.907(2)                                                     | 11.3682(2)                                                      | 11.630(2)                                                     | 11.153(3)                                                     |
| <i>c</i> /Å                                 | 13.273(3)                                                     | 13.7388(2)                                                      | 13.421(2)                                                     | 13.566(4)                                                     |
| $\alpha$ /°                                 | 81.380(2)                                                     | 84.165(1)                                                       | 82.162(5)                                                     | 85.062(4)                                                     |
| $\beta$ /°                                  | 70.064(2)                                                     | 74.550(1)                                                       | 72.106(5)                                                     | 74.512(3)                                                     |
| $\gamma$ /°                                 | 71.719(2)                                                     | 72.852(1)                                                       | 72.058(5)                                                     | 72.396(3)                                                     |
| Calculated density /g cm <sup>-3</sup>      | 1.400                                                         | 1.415                                                           | 1.411                                                         | 1.437                                                         |
| Volume /Å <sup>3</sup>                      | 1555.0(5)                                                     | 1517.71(5)                                                      | 1510.4(5)                                                     | 1480.6(7)                                                     |
| <i>Z</i>                                    | 2                                                             | 2                                                               | 2                                                             | 2                                                             |
| Temperature /K                              | 101(2)                                                        | 100(2)                                                          | 105(2)                                                        | 108(2)                                                        |
| Independent reflections                     | 8339                                                          | 7684                                                            | 7485                                                          | 7068                                                          |
| R <sub>int</sub>                            | 0.0637                                                        | 0.0311                                                          | 0.0974                                                        | 0.0289                                                        |
| R <sub>1</sub> [ <i>I</i> > 2σ( <i>I</i> )] | 0.0496                                                        | 0.0459                                                          | 0.0503                                                        | 0.0681                                                        |

\* Although the structure of the DMF solvate has been published previously (QEZJEJ<sup>5</sup>), data were recollected at 100 K for comparative purposes.

## Powder X-ray diffraction

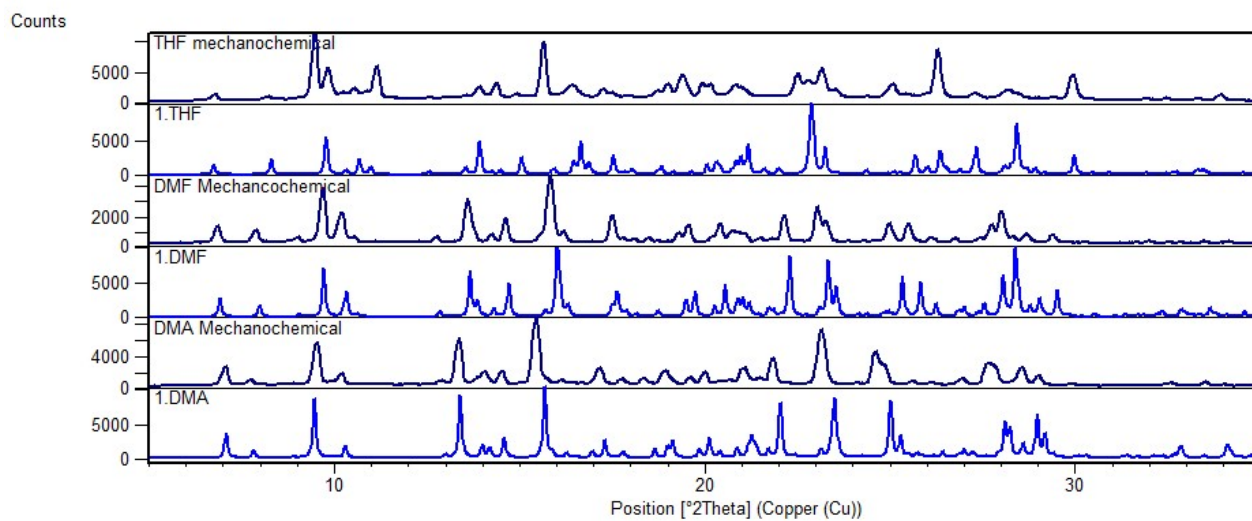

**Figure S1:** PXRD patterns of **1-solvent** synthesized mechanochemically.

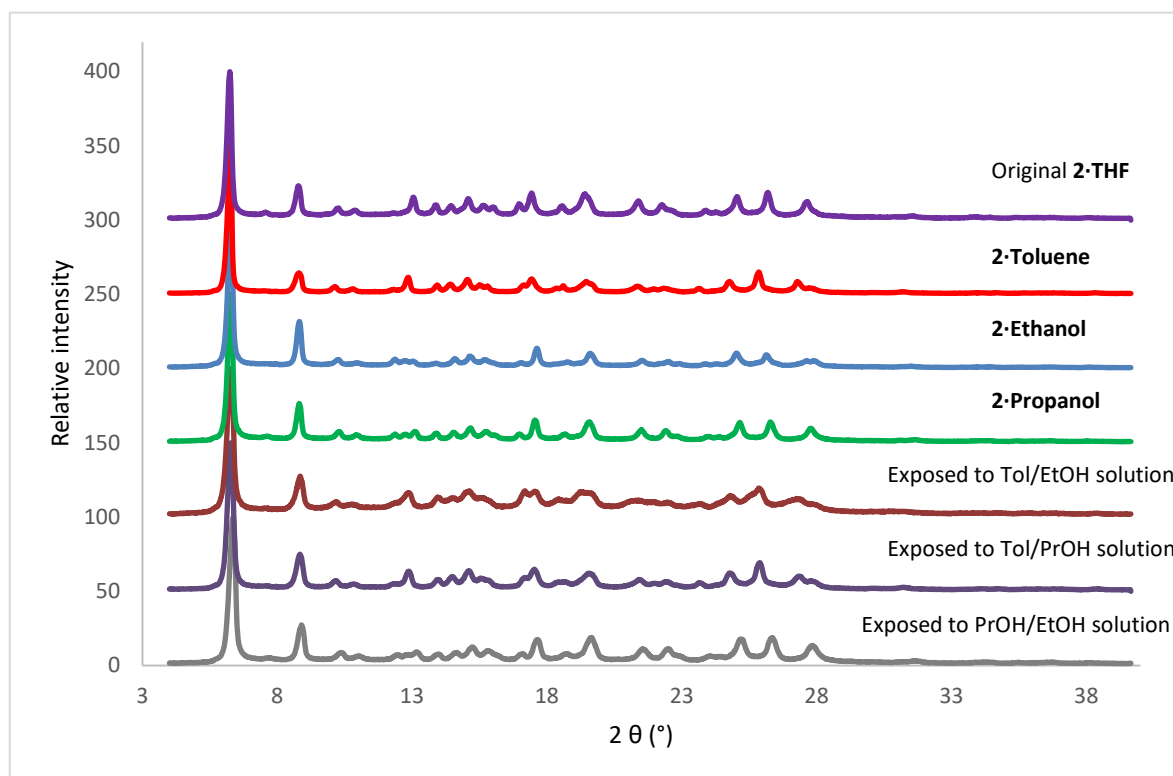

**Figure S2:** PXRD patterns of **2·THF** after exchanged occurred with toluene, ethanol and 1-propanol. Crystals of **2·THF** were also immersed in mixtures of these solvents, and both these sets display a similar pattern to the original **2·THF**, implying that the framework was retained after exchange.

## Results of selectivity experiments

### Selectivity from solution with 1

Values given on bold are from experiments carried out at room temperature. For the other experiments crystallisation was done in the refrigerator.

| DMA/DMF       |            |
|---------------|------------|
| ZDMA          | XDMA       |
| 0.0842        | 0.1        |
| 0.064         | 0.1        |
| 0.1757        | 0.2        |
| 0.1909        | 0.2        |
| 0.1374        | 0.2        |
| 0.1535        | 0.2        |
| <b>0.1058</b> | <b>0.2</b> |
| <b>0.1153</b> | <b>0.2</b> |
| 0.296         | 0.3        |
| 0.3266        | 0.3        |
| 0.5275        | 0.4        |
| 0.5306        | 0.4        |
| 0.5208        | 0.4        |
| 0.5427        | 0.4        |
| <b>0.4449</b> | <b>0.4</b> |
| <b>0.4497</b> | <b>0.4</b> |
| 0.6832        | 0.5        |
| 0.6929        | 0.5        |
| 0.8084        | 0.6        |
| 0.8117        | 0.6        |
| 0.8048        | 0.6        |
| 0.8154        | 0.6        |
| 0.8819        | 0.7        |
| 0.8841        | 0.7        |
| 0.9279        | 0.8        |
| 0.9238        | 0.8        |
| 0.9349        | 0.8        |
| 0.93          | 0.8        |
| 0.9632        | 0.9        |
| 0.9682        | 0.9        |

| DMA/DMSO       |            |
|----------------|------------|
| ZDMA           | XDMA       |
| 0.04124        | 0.2        |
| 0.04841        | 0.2        |
| <b>0.05303</b> | <b>0.2</b> |
| <b>0.00748</b> | <b>0.2</b> |
| 0.8541         | 0.5        |
| 0.7672         | 0.5        |
| <b>0.8094</b>  | <b>0.5</b> |
| <b>0.8291</b>  | <b>0.5</b> |
| 0.9669         | 0.8        |
| 0.9765         | 0.8        |

| DMSO/DMF      |            |
|---------------|------------|
| ZDMF          | XDMF       |
| 0.1189        | 0.2        |
| 0.1211        | 0.2        |
| <b>0.1105</b> | <b>0.2</b> |
| <b>0.1119</b> | <b>0.2</b> |
| 0.3701        | 0.5        |
| 0.3879        | 0.5        |
| <b>0.403</b>  | <b>0.5</b> |
| <b>0.4388</b> | <b>0.5</b> |
| 0.7962        | 0.8        |
| 0.7877        | 0.8        |
| <b>0.8075</b> | <b>0.8</b> |
| <b>0.8227</b> | <b>0.8</b> |

## Selectivity by mechanochemistry with 1

| <b>DMA/DMF</b>   |                  |
|------------------|------------------|
| Z <sub>DMA</sub> | X <sub>DMA</sub> |
| 0.2453           | 0.2              |
| 0.2132           | 0.2              |
| 0.2171           | 0.2              |
| 0.1566           | 0.2              |
| 0.213            | 0.2              |
| 0.4869           | 0.4              |
| 0.5053           | 0.4              |
| 0.4858           | 0.4              |
| 0.748            | 0.6              |
| 0.725            | 0.6              |
| 0.7424           | 0.6              |
| 0.909            | 0.8              |
| 0.9241           | 0.8              |
| 0.9179           | 0.8              |

| <b>DMA/DMSO</b>  |                  |
|------------------|------------------|
| Z <sub>DMA</sub> | X <sub>DMA</sub> |
| 0.02899          | 0.2              |
| 0.05128          | 0.2              |
| 0.5312           | 0.5              |
| 0.5149           | 0.5              |
| 0.7919           | 0.8              |
| 0.8744           | 0.8              |

| <b>DMSO/DMF</b>  |                  |
|------------------|------------------|
| Z <sub>DMF</sub> | X <sub>DMF</sub> |
| 0.0797           | 0.2              |
| 0.1086           | 0.2              |
| 0.1055           | 0.2              |
| 0.3513           | 0.5              |
| 0.3479           | 0.5              |
| 0.3616           | 0.5              |
| 0.6094           | 0.7              |
| 0.4931           | 0.7              |
| 0.8197           | 0.8              |
| 0.8105           | 0.8              |
| 0.7057           | 0.8              |
| 0.6929           | 0.8              |
| 0.8223           | 0.9              |
| 0.8356           | 0.9              |

## Selectivity from solution with 2

These values have been normalized to give a total of 100% to enable comparison, even when the guest occupancy was not 100%. In all cases, either no THF was evident in the NMR, or only trace amounts of THF were observed, *i.e.* exchange was complete.

| Toluene/EtOH |          |  |
|--------------|----------|--|
| Ztoluene     | Xtoluene |  |
| 0.9261       | 0.2      |  |
| 0.9556       | 0.2      |  |
| 0.9496       | 0.4      |  |
| 0.9649       | 0.4      |  |
| 0.9601       | 0.4      |  |
| 0.9583       | 0.5      |  |
| 0.9681       | 0.5      |  |
| 0.9610       | 0.5      |  |
| 0.9673       | 0.6      |  |
| 0.9754       | 0.6      |  |
| 0.9680       | 0.6      |  |
| 0.9720       | 0.8      |  |
| 0.9773       | 0.8      |  |
| 0.9742       | 0.8      |  |

| Toluene/PrOH |          |  |
|--------------|----------|--|
| Ztoluene     | Xtoluene |  |
| 0.5139       | 0.2      |  |
| 0.719        | 0.2      |  |
| 0.7183       | 0.2      |  |
| 0.6421       | 0.4      |  |
| 0.8400       | 0.4      |  |
| 0.8583       | 0.4      |  |
| 0.8777       | 0.5      |  |
| 0.9707       | 0.5      |  |
| 0.8608       | 0.5      |  |
| 0.8858       | 0.6      |  |
| 0.9061       | 0.6      |  |
| 0.9326       | 0.6      |  |
| 0.9107       | 0.8      |  |
| 0.9330       | 0.8      |  |
| 0.9292       | 0.8      |  |

| PrOH/EtOH |       |  |
|-----------|-------|--|
| ZPrOH     | XPrOH |  |
| 0.3772    | 0.2   |  |
| 0.5429    | 0.4   |  |
| 0.7262    | 0.5   |  |
| 0.8169    | 0.6   |  |
| 0.9415    | 0.8   |  |

## Selectivity by mechanochemistry with 2

| Toluene/EtOH |          |  |
|--------------|----------|--|
| Ztoluene     | Xtoluene |  |
| 0.6353       | 0.2      |  |
| 0.709        | 0.2      |  |
| 0.7453       | 0.2      |  |
| 0.7901       | 0.4      |  |
| 0.952        | 0.4      |  |
| 0.9655       | 0.4      |  |
| 0.8333       | 0.5      |  |
| 0.974        | 0.5      |  |
| 0.9708       | 0.5      |  |
| 0.9479       | 0.6      |  |
| 0.9551       | 0.6      |  |
| 0.9774       | 0.6      |  |
| 0.9412       | 0.8      |  |
| 0.9924       | 0.8      |  |
| 0.9754       | 0.8      |  |

| Toluene/PrOH |          |  |
|--------------|----------|--|
| Ztoluene     | Xtoluene |  |
| 0.0418       | 0.2      |  |
| 0.1289       | 0.2      |  |
| 0.0663       | 0.2      |  |
| 0.4265       | 0.4      |  |
| 0.5286       | 0.4      |  |
| 0.5245       | 0.4      |  |
| 0.4341       | 0.5      |  |
| 0.6267       | 0.5      |  |
| 0.7458       | 0.5      |  |
| 0.6486       | 0.6      |  |
| 0.754        | 0.6      |  |
| 0.8083       | 0.6      |  |
| 0.8174       | 0.8      |  |
| 0.8495       | 0.8      |  |
| 0.9048       | 0.8      |  |

| PrOH/EtOH |       |  |
|-----------|-------|--|
| ZPrOH     | XPrOH |  |
| 0.77      | 0.2   |  |
| 0.7548    | 0.2   |  |
| 0.957     | 0.4   |  |
| 0.9511    | 0.4   |  |
| 0.9724    | 0.4   |  |
| 0.9507    | 0.5   |  |
| 0.8978    | 0.5   |  |
| 0.9825    | 0.6   |  |
| 0.9461    | 0.6   |  |
| 0.9874    | 0.6   |  |
| 0.9785    | 0.8   |  |
| 0.9742    | 0.8   |  |
| 1         | 0.8   |  |

## References

- 1 *SAINT Data Collection Software*, version V7.99a, Bruker AXS Inc., Madison, WI, 2012.
- 2 L. J. Barbour, *J. Supramol. Chem.*, 2001, **1**, 189–191; J. L. Atwood and L. J. Barbour, *Cryst. Growth Des.*, 2003, **3**, 3–8.
- 3 G. M. Sheldrick, *Acta Crystallogr. Sect. A Found. Crystallogr.*, 2008, **64**, 112–122.
- 4 G. M. Sheldrick, *Acta Crystallogr. Sect. C Struct. Chem.*, 2015, **71**, 3–8.
- 5 T.-M. Shang, Q.-F. Zhou and J.-H. Sun, *Acta Crystallogr. Sect. E.*, 2007, **63**, o506.
